# Supplementary material for: Global trends in refractive disorders from 1990 to 2021: insights from the global burden of disease study and predictive modeling
Source: Front Public Health. 2025 Mar 26;13:1449607. doi: 10.3389/fpubh.2025.1449607 (PMC11978637; doi:10.3389/fpubh.2025.1449607)
Supplement: Supplementary file 4 [file Table_2.XLSX]

## Sheet: Sheet1
	Prevalence(95%UI)					DALYs(95%UI)
	Case(n),1990	Prevalance(per100,000 population),1990	Case(n),2021	Prevalance(per100,000 population),2021	EAPC, 1990-2021	Case(n),1990	DALYs(per100,000 population),1990	Case(n),2021	DALYs(per100,000 population),2021	EAPC, 1990-2021
Region
Advanced Health System	21406540	1517.2 (1363.41-1668.36)	27171069	1487.67 (1336.12-1641.09)	-0.05 (-0.06--0.05)	818528	57.45 (39.1-84.45)	1046517	55.56 (37.61-81.89)	-0.09 (-0.1--0.09)
Africa	6923530	1506.83 (1355.98-1666.94)	15394986	1502.34 (1337.34-1681.67)	-0.07 (-0.12--0.03)	293812	68.91 (49.13-96.51)	642971	66.4 (47-94.51)	-0.16 (-0.21--0.11)
African Region	4779397	1341.8 (1204.54-1491.49)	11230136	1370.39 (1222.86-1535.97)	0 (-0.05-0.05)	205714	62.33 (44.65-87.44)	473836	61.52 (43.68-86.82)	-0.07 (-0.13--0.01)
America	12661414	1813.56 (1624.71-2007.67)	20608395	1865.85 (1672.21-2060.69)	0.19 (0.15-0.23)	501028	72.82 (49.45-106.34)	825368	73.29 (49.9-106.96)	0.11 (0.08-0.15)
Andean Latin America	857004	2733.78 (2448.24-3024.76)	1711240	2642.66 (2381.51-2927.88)	-0.16 (-0.21--0.1)	33925	113.29 (78.18-164.54)	66855	103.92 (70.64-151.08)	-0.33 (-0.38--0.28)
Asia	61058438	2437 (2168.02-2711.73)	105818622	2134.62 (1897.14-2392.73)	-0.48 (-0.53--0.42)	2651504	109.48 (77.98-151.98)	4466396	89.65 (62.28-128.39)	-0.68 (-0.74--0.62)
Australasia	283175	1372.15 (1232.94-1524.83)	458789	1370.99 (1223.5-1526.15)	0.04 (0.02-0.07)	10426	50.09 (34.07-74.3)	17272	49.73 (33.15-73.88)	0.02 (0-0.05)
Basic Health System	35815932	1863.4 (1672.36-2059.39)	62182399	1812.52 (1630.4-1992.79)	-0.07 (-0.13--0.02)	1533377	82.89 (59.05-116.41)	2665781	76.54 (53.29-110.05)	-0.2 (-0.29--0.11)
Caribbean	596665	1831.48 (1639.68-2029.86)	854693	1717.08 (1531.96-1909.93)	-0.21 (-0.22--0.19)	23031	72.39 (49.28-106.48)	33093	65.96 (44.48-97.75)	-0.29 (-0.31--0.28)
Central Africa	546783	1320.59 (1175.71-1477.84)	1385724	1337.08 (1186.49-1492.77)	0 (-0.03-0.02)	20630	52.89 (36.67-75.47)	52346	53.37 (36.83-76.88)	0.01 (-0.02-0.04)
Central Asia	1068170	1826.84 (1619.37-2049.87)	1599533	1746.41 (1546.44-1964.81)	-0.14 (-0.15--0.13)	39882	69.16 (46.84-101.42)	59718	65.59 (44.25-97.47)	-0.17 (-0.17--0.16)
Central Europe	1763264	1282.96 (1137.58-1436.73)	2044563	1259.82 (1114.76-1410.88)	-0.09 (-0.11--0.07)	62153	45.19 (29.83-67)	72485	44.5 (29.49-65.52)	-0.08 (-0.1--0.06)
Central Latin America	3173170	2412.28 (2160.22-2667.54)	5734174	2226.69 (1990.96-2459.71)	-0.3 (-0.31--0.28)	131636	106.26 (74.75-152.23)	240347	93.6 (65.18-135.81)	-0.44 (-0.45--0.43)
Central Sub-Saharan Africa	534501	1706.33 (1515.21-1921.43)	1391685	1741.79 (1548.33-1952.78)	0.05 (0.03-0.07)	19134	63.79 (43.85-92.54)	49849	64.98 (44.13-94.29)	0.06 (0.04-0.09)
Commonwealth High Income	1747530	1474.59 (1327.9-1626.84)	2340984	1427.37 (1282.19-1575.77)	-0.1 (-0.11--0.09)	66973	55.34 (37.17-81.59)	90075	52.59 (35.02-77.85)	-0.16 (-0.17--0.15)
Commonwealth Low Income	2846241	2266.27 (2014.22-2517.26)	6155782	2164.49 (1889.42-2441.04)	-0.03 (-0.06-0)	120307	101.12 (71.83-140.74)	250020	89.52 (61.32-128.01)	-0.27 (-0.32--0.23)
Commonwealth Middle Income	32104717	4059.91 (3614.41-4573.76)	55603702	3124.94 (2753.59-3551.95)	-0.93 (-1.02--0.84)	1395575	184.45 (132.3-257.85)	2301244	131.53 (91.67-186.41)	-1.21 (-1.29--1.13)
East Asia	15325817	1557.41 (1387.6-1731.54)	27707612	1456.79 (1291.02-1629.15)	-0.23 (-0.34--0.12)	708410	73.35 (53.26-100.85)	1264468	64.98 (46-91.1)	-0.32 (-0.48--0.17)
East Asia & Pacific - WB	24662606	1542.72 (1381.3-1710.07)	41965248	1493.78 (1335.89-1657.83)	-0.11 (-0.18--0.04)	1080544	69.3 (49.4-96.98)	1834503	63.55 (44.12-90.97)	-0.23 (-0.33--0.13)
Eastern Africa	1505091	1235.5 (1117.69-1363.25)	3345784	1160.31 (1041.53-1283.67)	-0.21 (-0.21--0.2)	68480	62.23 (45.65-85.75)	147076	55.37 (39.51-77.79)	-0.35 (-0.37--0.33)
Eastern Europe	5691994	2241.99 (2007.75-2503.35)	5992338	2188.17 (1961.21-2444.5)	-0.05 (-0.06--0.04)	206374	81.17 (54.56-120.6)	214816	78.06 (52.35-115.98)	-0.09 (-0.11--0.08)
Eastern Mediterranean Region	7639076	2709.36 (2425.4-3008.46)	15763961	2510.7 (2240.37-2805.45)	-0.32 (-0.36--0.28)	317077	119.09 (83.92-168.93)	648499	107.12 (75.1-153.85)	-0.41 (-0.45--0.37)
Eastern Sub-Saharan Africa	1436051	1121.13 (1014.05-1235.77)	3244072	1068.75 (958.13-1188.04)	-0.13 (-0.15--0.11)	65472	56.42 (41.36-77.58)	143294	51.29 (36.68-71.99)	-0.25 (-0.28--0.21)
Europe	15194630	1721.18 (1544.21-1888.33)	17764175	1676.47 (1501-1843.89)	-0.07 (-0.08--0.07)	577429	64.78 (44.36-95.26)	677023	62.25 (42.45-91.79)	-0.11 (-0.12--0.11)
Europe & Central Asia - WB	15916188	1719 (1541.84-1887.04)	18926523	1670.13 (1496.02-1835.27)	-0.08 (-0.09--0.08)	604227	64.71 (44.31-95.17)	720220	62.07 (42.26-91.68)	-0.12 (-0.12--0.11)
European Region	16017515	1716.75 (1539.59-1884.61)	19109654	1667.37 (1493.65-1832.23)	-0.08 (-0.09--0.08)	608042	64.63 (44.26-95.04)	727159	61.96 (42.19-91.54)	-0.12 (-0.13--0.11)
High-income Asia Pacific	2122794	1189.5 (1071.02-1307.36)	2769221	1192.53 (1070.1-1310.75)	0.03 (0.01-0.04)	83451	46.26 (31.31-67.56)	113455	45.78 (31.03-67.33)	-0.01 (-0.02-0)
High-income North America	3080307	1051.17 (935.58-1165.51)	4279805	1065.69 (950.02-1181.34)	0.07 (0.05-0.09)	118905	39.97 (26.92-58.58)	165979	39.69 (26.6-58.45)	0 (-0.01-0.01)
Latin America & Caribbean - WB	9641169	2504.17 (2249.67-2749.21)	16392980	2387.61 (2144.53-2618.33)	-0.01 (-0.07-0.04)	384450	103.99 (72.14-151.6)	661905	95.99 (66.06-140.18)	-0.13 (-0.17--0.08)
Limited Health System	37507739	3657.42 (3257.98-4115.19)	67260517	2900.19 (2556.11-3289.72)	-0.82 (-0.89--0.74)	1625055	166.24 (118.99-232.63)	2777818	122.23 (85.2-173.68)	-1.09 (-1.16--1.02)
Middle East & North Africa - WB	5261027	2533.94 (2280.5-2792.06)	10358683	2395.04 (2144.21-2639.83)	-0.24 (-0.26--0.21)	219679	113.21 (79.84-159.94)	431962	102.37 (71.71-147.09)	-0.39 (-0.41--0.36)
Minimal Health System	1171796	1269.83 (1132.19-1408.95)	3043579	1383.39 (1234.03-1550.4)	0.17 (0.1-0.24)	49275	57.68 (40.86-80.81)	124387	60.94 (43.37-85.45)	0.09 (0.01-0.17)
North Africa and Middle East	6586898	2386.92 (2147.7-2636.84)	12976695	2280.95 (2040.24-2514.18)	-0.19 (-0.22--0.16)	276369	106.87 (75.37-151.65)	539124	97.01 (67.72-139.63)	-0.36 (-0.39--0.33)
North America	3080685	1051.29 (935.68-1165.64)	4280388	1065.79 (950.11-1181.45)	0.07 (0.05-0.09)	118921	39.98 (26.92-58.58)	166003	39.7 (26.6-58.45)	0 (-0.01-0.01)
Northern Africa	2296096	2302.34 (2064.83-2536.7)	4360779	2270.26 (2021.36-2521.66)	-0.09 (-0.11--0.06)	92399	98.07 (68.19-140.09)	175466	93.26 (64.73-135.13)	-0.21 (-0.24--0.18)
Oceania	112742	2595.06 (2253.14-2965.26)	259189	2518.86 (2183.35-2876.59)	-0.13 (-0.22--0.05)	3656	83.02 (53.33-126.54)	8294	79.66 (50.59-121.23)	-0.16 (-0.24--0.08)
Region of the Americas	12661414	1813.56 (1624.71-2007.67)	20608395	1865.85 (1672.21-2060.69)	0.19 (0.15-0.23)	501028	72.82 (49.45-106.34)	825368	73.29 (49.9-106.96)	0.11 (0.08-0.15)
South-East Asia Region	34489684	3842.58 (3420.17-4323.41)	57302451	2928.9 (2587.07-3306.73)	-0.94 (-1.03--0.85)	1490098	173.89 (124.41-243.18)	2361078	121.8 (84.52-174.01)	-1.25 (-1.32--1.17)
South Asia	32081349	4446.18 (3962.59-5006.29)	55485190	3397.67 (2991.52-3859.72)	-0.95 (-1.04--0.86)	1391910	201.54 (144.62-281.61)	2285352	141.73 (98.52-201.42)	-1.26 (-1.34--1.18)
South Asia - WB	32670157	4385.5 (3908.54-4938.81)	56633677	3374.4 (2971.6-3832)	-0.93 (-1.02--0.84)	1415288	198.49 (142.36-277.44)	2329804	140.61 (97.7-199.97)	-1.23 (-1.31--1.16)
Southeast Asia	7178590	1838.75 (1644.85-2042.66)	11320903	1633.62 (1470.42-1800.88)	-0.43 (-0.45--0.41)	288187	77.89 (53.77-111.99)	451649	65.31 (44.11-95.59)	-0.6 (-0.63--0.58)
Southern Africa	1000160	1580 (1416.94-1751.92)	2029146	1551.95 (1378.09-1733.11)	-0.08 (-0.11--0.05)	42731	71.72 (50.97-99.72)	83564	66.78 (47.4-93.87)	-0.21 (-0.24--0.17)
Southern Latin America	967604	1978.74 (1782.79-2187.75)	1363645	1893.73 (1692.83-2098.87)	-0.09 (-0.11--0.06)	36046	74.15 (49.72-109.58)	50358	68.76 (45.66-101.75)	-0.17 (-0.2--0.14)
Southern Sub-Saharan Africa	602786	1568.84 (1402.08-1742.35)	1059805	1535.31 (1361.35-1716.51)	-0.1 (-0.14--0.06)	25596	70.29 (50.26-97.95)	44575	66.2 (46.92-93.48)	-0.18 (-0.22--0.14)
Sub-Saharan Africa - WB	4645185	1304.78 (1172.4-1448.46)	11065525	1336.63 (1194.94-1493)	0.01 (-0.04-0.06)	202243	61.49 (44.12-85.77)	468890	60.61 (43.07-85.42)	-0.08 (-0.13--0.02)
Tropical Latin America	4067963	2968.45 (2679.31-3262.59)	6759436	2810.82 (2524.81-3085.81)	0.19 (0.06-0.31)	160632	122.13 (84.37-177.31)	272422	112.22 (77-163.19)	0.07 (-0.04-0.18)
Western Africa	1575399	1209.59 (1082.76-1340.58)	4273553	1381.46 (1229.56-1556.25)	0.26 (0.14-0.39)	69572	58.2 (41.92-81.49)	184520	64.69 (45.78-91.6)	0.23 (0.1-0.36)
Western Europe	6730264	1600.58 (1437.43-1763.41)	8083424	1564.83 (1401.07-1733.45)	-0.06 (-0.07--0.04)	268013	61.9 (42.03-90.52)	323694	59.23 (39.76-87.31)	-0.12 (-0.13--0.1)
Western Pacific Region	20042601	1506.97 (1348.58-1666.05)	35190279	1483.52 (1321.63-1646.19)	-0.06 (-0.14-0.02)	894553	68.62 (49.21-95.16)	1563267	63.98 (44.82-91.19)	-0.17 (-0.29--0.05)
Western Sub-Saharan Africa	1717211	1199.13 (1073.99-1329.43)	4669907	1350.54 (1202.95-1519.49)	0.23 (0.11-0.34)	75876	57.78 (41.61-80.8)	201501	63.29 (44.79-89.46)	0.18 (0.06-0.3)
World Bank High Income	14916474	1366.21 (1224.88-1506.5)	19772252	1376.68 (1234.14-1514.28)	0.04 (0.03-0.05)	565464	52.28 (35.25-76.61)	760513	51.76 (34.87-76.24)	-0.02 (-0.03--0.01)
World Bank Low Income	3002765	1383.3 (1243.48-1527.31)	6809011	1378.41 (1232.53-1534.41)	-0.05 (-0.09--0.01)	136844	63.32 (45.13-88.54)	300772	60.32 (42.59-85.43)	-0.19 (-0.23--0.14)
World Bank Lower Middle Income	45968220	3265.65 (2901.61-3665.28)	80035244	2675.58 (2369.65-3016.56)	-0.7 (-0.76--0.64)	1895599	145.62 (102.81-204.06)	3175423	111.9 (77.71-159.96)	-0.93 (-0.99--0.88)
World Bank Upper Middle Income	32014127	1858.32 (1668.38-2053.95)	53040484	1799.21 (1617-1982.35)	-0.07 (-0.13--0.01)	1408052	80.65 (57.78-113.56)	2345432	75.29 (52.69-108.35)	-0.14 (-0.24--0.05)
Country
Afghanistan	235622	2719.35 (2420.93-3043.43)	600830	2575.88 (2287.94-2874.74)	-0.21 (-0.22--0.2)	10040	120.11 (84.27-170.24)	23859	109.77 (76.42-156.44)	-0.34 (-0.35--0.33)
Albania	34324	1267.16 (1119.07-1428.06)	43419	1254 (1107.48-1402.06)	-0.06 (-0.08--0.04)	1216	45.14 (29.91-66.99)	1556	44.75 (29.67-66.32)	-0.05 (-0.07--0.04)
Algeria	517304	2567.42 (2289.6-2849.1)	961070	2331.36 (2089.62-2603.2)	-0.32 (-0.34--0.31)	21015	110.88 (77.74-159.22)	38913	95.71 (66.12-139.34)	-0.49 (-0.51--0.48)
American Samoa	711	2270.88 (1968.17-2599.8)	1077	2145.97 (1851.64-2460.19)	-0.18 (-0.19--0.17)	24	73.63 (46.65-111.01)	34	68.08 (43.12-104.32)	-0.24 (-0.26--0.23)
Andorra	805	1429.58 (1278.84-1569.38)	1361	1406.55 (1253.88-1559.88)	-0.07 (-0.07--0.06)	31	54.25 (36.58-80.34)	53	52.53 (35.09-77.59)	-0.11 (-0.12--0.11)
Angola	137591	2600.05 (2309.46-2949.73)	426278	2521.12 (2233.6-2818.51)	-0.17 (-0.19--0.15)	5099	100.07 (68.95-143.05)	15402	94.29 (64.38-136.34)	-0.24 (-0.26--0.23)
Antigua and Barbuda	884	1515.71 (1350.22-1688.15)	1388	1420.9 (1258.19-1593.21)	-0.21 (-0.23--0.2)	34	58.8 (40.11-87.19)	53	53.26 (36.1-78.74)	-0.32 (-0.33--0.31)
Argentina	673363	2050.79 (1840.84-2266.2)	951586	1973.22 (1763.09-2191.23)	-0.04 (-0.08--0.01)	25795	78.77 (53.26-115.25)	35964	73.43 (49.01-107.95)	-0.13 (-0.17--0.09)
Armenia	58607	1870.8 (1649.7-2095.67)	63902	1784.46 (1566.73-2005.45)	-0.15 (-0.16--0.14)	2216	71.26 (48.09-104.65)	2430	67.03 (44.82-99.59)	-0.2 (-0.21--0.19)
Australia	232159	1353.68 (1217.97-1505.13)	379677	1358 (1210.64-1508.06)	0.07 (0.04-0.09)	8534	49.33 (33.51-73.36)	14301	49.23 (32.63-73.03)	0.05 (0.02-0.07)
Austria	125007	1449.68 (1298.84-1596.02)	149027	1409.98 (1261.74-1559.53)	-0.1 (-0.11--0.09)	4925	55.38 (37.49-80.73)	5905	52.91 (36.09-77.35)	-0.16 (-0.16--0.15)
Azerbaijan	116660	1858.55 (1646.74-2087.89)	194304	1791.14 (1583.69-2023.86)	-0.12 (-0.13--0.11)	4389	70.82 (47.55-103.95)	7324	67.63 (45.6-99.26)	-0.15 (-0.17--0.13)
Bahamas	3454	1495.9 (1332.82-1665.5)	5802	1416.51 (1258.39-1587.69)	-0.18 (-0.19--0.17)	129	57.73 (39.03-85.28)	218	53.13 (35.61-78.66)	-0.27 (-0.28--0.27)
Bahrain	9830	2560.88 (2281.77-2846.66)	31354	2297.61 (2040.54-2541.49)	-0.37 (-0.39--0.35)	395	109.76 (76.78-156.23)	1249	93.53 (64.86-134.9)	-0.54 (-0.57--0.52)
Bangladesh	2080027	3206.51 (2830.28-3587.95)	4466276	2977.82 (2601.48-3367.82)	-0.14 (-0.18--0.1)	83375	133.98 (92.4-188.38)	171943	115.32 (76.86-168.07)	-0.39 (-0.43--0.35)
Barbados	2071	778.44 (698.44-867.19)	2655	748.8 (665.92-830.7)	-0.11 (-0.13--0.09)	81	30.17 (20.57-44.62)	104	28.3 (19.09-41.64)	-0.19 (-0.21--0.17)
Belarus	222835	1894.52 (1676.19-2130.06)	230835	1832.5 (1619.11-2065.13)	-0.12 (-0.13--0.11)	7851	66.79 (44.18-100.11)	8009	63.75 (41.96-95.61)	-0.16 (-0.16--0.15)
Belgium	160394	1457.92 (1307.57-1608.7)	190416	1413.66 (1268.13-1565.96)	-0.1 (-0.11--0.1)	6368	56.1 (37.98-82.01)	7510	52.93 (36.03-78.39)	-0.18 (-0.19--0.17)
Belize	2350	1547.1 (1375.09-1718.13)	5854	1449.98 (1292.97-1621.69)	-0.19 (-0.2--0.18)	88	61.23 (41.29-90.21)	218	55.23 (37.19-81.95)	-0.31 (-0.32--0.3)
Benin	31181	900.83 (801.17-999.41)	124221	1451.25 (1272.78-1636.78)	1.34 (1.15-1.53)	1397	45.51 (32.99-62.41)	5584	71.26 (50.32-98.14)	1.26 (1.05-1.47)
Bermuda	988	1586.17 (1410.27-1764.78)	1208	1506.12 (1327.38-1680.33)	-0.15 (-0.17--0.14)	39	61.76 (42.14-91.54)	48	56.94 (38.23-84.27)	-0.25 (-0.26--0.24)
Bhutan	8603	2593.23 (2300.58-2914.17)	14410	2202.02 (1969.94-2485.38)	-0.63 (-0.73--0.53)	379	122.19 (88.24-166.69)	627	97.06 (69.65-136.39)	-0.83 (-0.92--0.75)
Bolivia (Plurinational State of)	127684	2472.19 (2221.25-2747.23)	262067	2342.84 (2105.07-2612.89)	-0.18 (-0.19--0.18)	5017	102.38 (70.58-147.12)	10242	93.14 (63.21-137.28)	-0.31 (-0.31--0.3)
Bosnia and Herzegovina	55741	1279.07 (1125.81-1443.24)	57999	1247.52 (1106.6-1403.05)	-0.12 (-0.14--0.1)	1978	45.47 (29.82-67.35)	2054	44.04 (29.44-65.21)	-0.14 (-0.17--0.12)
Botswana	14422	1600.44 (1404.98-1817.84)	29204	1473.05 (1295.61-1663.33)	-0.32 (-0.33--0.3)	602	70.75 (49.17-99.38)	1173	60.44 (41.71-87.36)	-0.56 (-0.58--0.55)
Brazil	3952985	2956.47 (2667.18-3249.04)	6526679	2795.57 (2508.72-3071.01)	0.19 (0.07-0.32)	156483	122.01 (84.38-177.08)	264118	111.97 (76.91-162.77)	0.07 (-0.04-0.18)
Brunei Darussalam	3140	1333.4 (1187.29-1476.53)	5680	1308.81 (1168.89-1450.38)	-0.05 (-0.07--0.04)	116	51.38 (34.88-75.48)	212	49.59 (33.47-73.29)	-0.09 (-0.11--0.08)
Bulgaria	145785	1367.8 (1214.24-1531.72)	140439	1336.96 (1187.53-1498.38)	-0.13 (-0.15--0.1)	5189	48.59 (32.07-71.95)	5015	47.42 (31.92-70.37)	-0.12 (-0.15--0.09)
Burkina Faso	60052	850.13 (757.75-948.15)	205140	1408.06 (1232.59-1599.8)	0.69 (0.29-1.1)	2570	39.79 (28.44-55.75)	8862	64.99 (45.44-91.65)	0.62 (0.18-1.06)
Burundi	29301	829.82 (739.49-918.8)	66855	805.99 (711.57-897.96)	-0.18 (-0.21--0.15)	1282	39.23 (28.13-55.22)	2823	36.96 (26.22-51.79)	-0.24 (-0.27--0.21)
Cabo Verde	3066	1135.39 (1015.62-1269.58)	5308	1031.86 (910.07-1169.43)	-0.31 (-0.33--0.29)	149	57.2 (41.18-79.43)	244	48.51 (34.01-68.53)	-0.53 (-0.56--0.51)
Cambodia	235482	2903.45 (2597.75-3226.47)	383535	2493.83 (2219.72-2787.66)	-0.75 (-0.97--0.52)	9392	126.13 (88.04-180.92)	15194	101.22 (68.61-144.7)	-0.9 (-1.11--0.69)
Cameroon	75311	1052.89 (928.36-1170.67)	215554	963.32 (853.87-1082.79)	-0.47 (-0.62--0.31)	3254	50.57 (36.21-70)	9164	45.2 (31.81-63.42)	-0.5 (-0.61--0.39)
Canada	281279	999.27 (888.64-1102.76)	411219	991.1 (886.11-1099.73)	-0.04 (-0.04--0.03)	10893	38.23 (25.54-56.56)	16346	37.41 (25.1-55.26)	-0.08 (-0.08--0.07)
Central African Republic	22834	1412.72 (1252.67-1598.85)	51673	1520.78 (1346.82-1701.29)	0.16 (0.12-0.2)	755	48.54 (32.52-70.9)	1729	52.21 (34.8-77.08)	0.18 (0.14-0.22)
Chad	43923	1008.07 (909.4-1108.99)	135627	1255.95 (1114.54-1410.81)	0.8 (0.7-0.89)	1997	50.37 (36.57-69.25)	5811	60.04 (42.27-83.95)	0.66 (0.56-0.76)
Chile	235012	1807.52 (1623.63-2002.84)	345369	1745.93 (1560.92-1941.49)	-0.13 (-0.13--0.12)	8081	62.86 (40.83-95.11)	11939	59.61 (38.43-89.61)	-0.18 (-0.19--0.17)
China	14885107	1567.67 (1396.55-1743.32)	26970569	1467.89 (1301.18-1641.36)	-0.23 (-0.34--0.11)	692062	74.31 (53.97-102.01)	1238862	65.89 (46.69-92.2)	-0.32 (-0.48--0.16)
Colombia	662820	2463.1 (2219.43-2742)	1198738	2285.43 (2044.21-2542.51)	-0.24 (-0.25--0.24)	26671	104.62 (73.04-150.66)	49047	92.88 (63.72-135.28)	-0.38 (-0.4--0.37)
Comoros	4004	1362.9 (1202.17-1545.62)	7271	1189.98 (1042.5-1348.81)	-0.45 (-0.47--0.43)	188	69.06 (49.78-95.55)	334	56.72 (40.62-80.02)	-0.64 (-0.66--0.62)
Congo	40927	2987.41 (2665.38-3346.11)	98510	2846.83 (2501.34-3210.85)	-0.24 (-0.27--0.22)	1464	109.93 (73.5-159.63)	3500	103.45 (69.67-151.53)	-0.27 (-0.29--0.24)
Cook Islands	336	2274.57 (1982.91-2604.9)	498	2131.81 (1853.95-2439.93)	-0.21 (-0.22--0.2)	11	74.84 (48.04-112.56)	16	68.04 (43.33-102.56)	-0.29 (-0.3--0.28)
Costa Rica	52683	2025.78 (1816.1-2232.94)	96635	1890.87 (1694.6-2099.94)	-0.21 (-0.22--0.2)	2094	84.27 (58.21-124.17)	3885	75.38 (51.25-111.08)	-0.35 (-0.35--0.34)
Croatia	70149	1270.93 (1123.36-1438.51)	77978	1245.04 (1098.12-1405.91)	-0.1 (-0.11--0.08)	2473	44.78 (29.53-66.97)	2760	43.9 (28.74-64.22)	-0.09 (-0.11--0.07)
Cuba	220991	2021.33 (1803.96-2245.71)	257987	1934.4 (1726.91-2173.11)	-0.13 (-0.16--0.11)	8614	79.26 (53.92-116.08)	10203	73.94 (49.54-109.59)	-0.21 (-0.24--0.18)
Cyprus	11354	1450.16 (1294.28-1604.89)	20742	1406.99 (1249.87-1562.04)	-0.11 (-0.12--0.1)	437	55.69 (37.54-81.02)	803	52.71 (36.03-77.88)	-0.18 (-0.19--0.17)
Czechia	151354	1263.91 (1114.58-1422.94)	189106	1231.65 (1085.95-1384.93)	-0.1 (-0.12--0.09)	5313	44.32 (29.86-66.37)	6661	43.27 (28.15-64.31)	-0.1 (-0.12--0.08)
C么te d'Ivoire	65896	707.71 (633.56-783.71)	263871	1438.28 (1268.78-1638.83)	0.89 (0.33-1.45)	2651	32.49 (23.25-45.51)	11485	67.69 (47.47-95.39)	0.96 (0.36-1.55)
Democratic People's Republic of Korea	232957	1351.88 (1193.69-1524.57)	356332	1183.8 (1039.67-1340.94)	-0.44 (-0.46--0.43)	9109	53.76 (36.7-76.76)	13077	43.19 (28.9-63.85)	-0.71 (-0.72--0.69)
Democratic Republic of the Congo	309466	1364.32 (1205.98-1542.7)	764917	1391.85 (1232.89-1558.79)	0.05 (0.03-0.08)	10946	50.7 (34.55-74.28)	27426	52.41 (35.57-76.29)	0.12 (0.09-0.15)
Denmark	88158	1540.14 (1383.03-1700.52)	102464	1505.83 (1341.08-1668.25)	-0.07 (-0.08--0.07)	3472	58.6 (39.29-85.41)	4045	56.23 (37.51-83.16)	-0.13 (-0.14--0.12)
Djibouti	3432	1381.2 (1218.02-1556.44)	11519	1210.2 (1063.97-1362.81)	-0.43 (-0.45--0.41)	158	70.15 (50.49-98.11)	518	57.83 (41.14-81.02)	-0.62 (-0.65--0.58)
Dominica	1021	1519.91 (1352.5-1698.14)	1042	1418.96 (1263.75-1592.24)	-0.23 (-0.24--0.22)	39	59.39 (40.02-87.7)	40	53.48 (35.92-80)	-0.34 (-0.35--0.33)
Dominican Republic	133353	2231.22 (2002.31-2495.7)	226687	2083.47 (1859.13-2325.88)	-0.21 (-0.23--0.2)	5161	91.38 (62.94-133.3)	8853	81.94 (56.15-120.51)	-0.34 (-0.35--0.33)
Ecuador	150127	1752.97 (1567.27-1944.36)	303262	1696.2 (1522.47-1886.55)	-0.13 (-0.14--0.12)	5823	71.92 (49.39-104.96)	12001	67.74 (46.61-98.09)	-0.21 (-0.22--0.2)
Egypt	1109602	2415.35 (2145.76-2668.96)	2285491	2513.09 (2232.37-2797.9)	0.03 (-0.03-0.08)	44341	102.44 (70.57-145.75)	91711	104.36 (72.62-149.36)	-0.05 (-0.12-0.01)
El Salvador	121466	2822.96 (2520.77-3146.3)	166045	2598.6 (2336.5-2868.46)	-0.22 (-0.24--0.2)	4895	120.32 (83.79-174.14)	6674	104.84 (72.84-153.65)	-0.4 (-0.42--0.38)
Equatorial Guinea	6044	2453.34 (2190.08-2753.5)	18503	2328.15 (2068.34-2634.67)	-0.28 (-0.31--0.25)	218	90.42 (61.63-131.08)	644	82.84 (56.14-121.13)	-0.4 (-0.43--0.37)
Eritrea	31236	1572.02 (1391.33-1770.22)	62298	1401.71 (1240.56-1596.89)	-0.4 (-0.43--0.36)	1678	93.87 (68.36-127.76)	3162	76.75 (56.02-104.26)	-0.65 (-0.69--0.61)
Estonia	22640	1246.06 (1099.93-1404.57)	22875	1204.02 (1059.38-1359.06)	-0.14 (-0.15--0.12)	802	44.2 (29.32-65.6)	800	42.27 (28.12-63.51)	-0.16 (-0.18--0.15)
Eswatini	8787	1732.77 (1543.32-1925.73)	13625	1614.64 (1435.42-1808.43)	-0.25 (-0.26--0.24)	366	78.23 (54.65-109.47)	552	68.72 (48.29-98.61)	-0.44 (-0.45--0.43)
Ethiopia	370565	934.14 (847.68-1022.46)	907325	1015.87 (904.09-1136.69)	0.35 (0.29-0.41)	15418	41.96 (29.9-59.61)	38051	45.12 (31.6-63.53)	0.33 (0.27-0.39)
Fiji	12322	2496.74 (2168.57-2864.78)	19786	2351.2 (2042.8-2690.77)	-0.06 (-0.14-0.01)	410	81.43 (51.44-122.75)	638	75.03 (46.62-113.46)	-0.12 (-0.2--0.05)
Finland	77275	1435.62 (1288.37-1588)	93591	1402.68 (1250.89-1545.39)	-0.09 (-0.1--0.08)	2985	54.13 (36.44-79.87)	3648	51.75 (34.85-76.32)	-0.15 (-0.16--0.14)
France	722071	1135.53 (1007.45-1253.16)	903894	1123.46 (996.99-1250.81)	-0.05 (-0.09--0.01)	29864	45.75 (30.9-66.16)	37442	44.06 (29.94-63.95)	-0.12 (-0.16--0.09)
Gabon	17638	2675.02 (2380.69-3008.67)	31804	2550.51 (2247.14-2880.66)	-0.21 (-0.23--0.2)	652	100.57 (67.9-145.9)	1147	93.41 (63.18-134.7)	-0.28 (-0.3--0.27)
Gambia	9887	1484.66 (1358.57-1603.99)	23409	1501.27 (1304.91-1721.7)	0.23 (0.11-0.36)	397	64.68 (45.66-91.57)	951	63.85 (44.16-91.61)	0.16 (0.04-0.28)
Georgia	109763	1858.91 (1643.58-2091.28)	82060	1802.65 (1592.43-2031.15)	-0.11 (-0.12--0.1)	4173	70.46 (47.88-104.15)	3126	67.75 (46.21-99.95)	-0.14 (-0.15--0.12)
Germany	1268877	1422.59 (1270.09-1573.69)	1442873	1391.51 (1233.92-1544.3)	-0.07 (-0.08--0.07)	49875	53.94 (37.07-78.9)	57191	51.84 (34.81-77.18)	-0.13 (-0.13--0.12)
Ghana	141044	1374.93 (1218.29-1546.47)	441664	1778.62 (1565.7-2009.55)	0.41 (0.12-0.69)	5573	59.72 (42.08-85.09)	18025	76.91 (53.48-110.55)	0.38 (0.07-0.69)
Greece	171036	1513.67 (1349.99-1683.27)	183060	1448.77 (1285.37-1622.04)	-0.16 (-0.17--0.15)	6891	59.3 (40.07-87.06)	7413	54.45 (37-80.39)	-0.29 (-0.3--0.28)
Greenland	540	1009.43 (898.74-1121.09)	558	994.6 (886.34-1103.23)	-0.07 (-0.08--0.07)	20	38.72 (26.23-56.61)	21	37.65 (25.1-55.72)	-0.11 (-0.11--0.1)
Grenada	1219	1540.94 (1369.59-1717.17)	1556	1431.5 (1281.2-1597.5)	-0.23 (-0.24--0.22)	47	60.54 (41.22-89.29)	59	54.09 (36.86-80.1)	-0.35 (-0.37--0.34)
Guam	2230	2270.55 (1973.67-2616.68)	4185	2153.2 (1842.75-2479.86)	-0.2 (-0.21--0.19)	74	74.03 (46.76-111.68)	134	69.23 (43.9-105.83)	-0.23 (-0.25--0.22)
Guatemala	170295	2695.75 (2415.71-2986.1)	361497	2474.31 (2211.26-2740.77)	-0.17 (-0.2--0.14)	6746	116.4 (80.45-167.33)	14348	101.62 (70.09-146.55)	-0.33 (-0.36--0.3)
Guinea	52754	1190.66 (1061.1-1325.16)	126953	1446.61 (1270.64-1653.32)	0.48 (0.34-0.62)	2444	59.01 (42.51-82.28)	5618	69.24 (48.86-96.53)	0.37 (0.22-0.53)
Guinea-Bissau	8925	1422.36 (1264.83-1580.94)	19825	1588.43 (1396.04-1789.25)	0.06 (-0.1-0.21)	405	71.94 (52.14-98.65)	876	77.52 (55.17-107.13)	-0.04 (-0.22-0.14)
Guyana	10010	1537.17 (1371.44-1711.31)	10615	1433.37 (1271.53-1606.36)	-0.21 (-0.22--0.19)	374	60.32 (41.24-87.71)	396	54.03 (36.45-78.94)	-0.32 (-0.34--0.31)
Haiti	80665	1554.06 (1378.47-1732.96)	166960	1466.58 (1305.15-1629.59)	-0.17 (-0.19--0.15)	3076	62.43 (43-91.61)	6257	56.87 (38.52-84.19)	-0.28 (-0.3--0.26)
Honduras	83227	2393.27 (2152.37-2649.43)	198328	2227.63 (1980.93-2474.14)	-0.2 (-0.22--0.19)	3217	98.73 (68.7-143.33)	7549	87.77 (60.69-128.15)	-0.35 (-0.36--0.33)
Hungary	141309	1150.64 (1015.65-1289.58)	150334	1122.71 (990.13-1259.53)	-0.13 (-0.16--0.1)	4946	40.24 (26.42-60.43)	5305	39.47 (26.15-59.69)	-0.11 (-0.13--0.08)
Iceland	3510	1337.04 (1178.88-1484.36)	5036	1308.03 (1147.74-1448.06)	-0.05 (-0.07--0.03)	136	51.64 (35.27-75.4)	198	49.67 (33.19-72.76)	-0.1 (-0.11--0.09)
India	27305628	4778.76 (4263.23-5375.43)	45201315	3495.7 (3079.16-3974.25)	-1.11 (-1.22--1)	1200020	219.63 (158.16-305.82)	1880365	146.97 (102.34-207.98)	-1.44 (-1.54--1.34)
Indonesia	2368069	1527.66 (1344.81-1717.18)	3572905	1311.56 (1169.7-1460.37)	-0.47 (-0.53--0.4)	97386	66.29 (46.32-95.78)	146293	54.11 (37.12-79.06)	-0.6 (-0.66--0.55)
Iran (Islamic Republic of)	1362746	3075.3 (2771.89-3367.21)	2276623	2743.7 (2470.71-3023.1)	-0.43 (-0.47--0.38)	62628	155.08 (111.93-213.01)	107784	130.81 (93.78-182.09)	-0.62 (-0.66--0.57)
Iraq	351868	2532.91 (2266.33-2810.77)	807560	2289.45 (2038.07-2569.22)	-0.34 (-0.36--0.33)	14112	109.45 (76.44-157.45)	31729	93.41 (65.41-133.7)	-0.54 (-0.56--0.52)
Ireland	54034	1453.68 (1311.75-1604.64)	76024	1405.01 (1258.03-1552.48)	-0.11 (-0.12--0.1)	2086	55.79 (36.96-81.59)	2955	52.67 (36.17-76.81)	-0.18 (-0.19--0.18)
Israel	71773	1450.62 (1307.13-1601.99)	142262	1421.49 (1263.06-1577.54)	-0.07 (-0.08--0.06)	2751	55.83 (37.47-82.09)	5463	53.67 (36.34-80.42)	-0.12 (-0.13--0.12)
Italy	1177076	1918.54 (1724.98-2122.96)	1287803	1876.33 (1688.12-2077.68)	-0.07 (-0.09--0.06)	46826	74.08 (49.53-108.61)	51636	70.56 (46.84-104.33)	-0.15 (-0.17--0.12)
Jamaica	32788	1521.95 (1349.9-1692.9)	42261	1424.67 (1263.87-1587.93)	-0.2 (-0.21--0.19)	1250	59.51 (40.43-89.09)	1608	53.92 (35.98-79.57)	-0.3 (-0.31--0.29)
Japan	1485283	1117.4 (1001.84-1232.8)	1875770	1109.45 (992.32-1226.36)	-0.01 (-0.03-0)	59307	43.63 (29.53-63.75)	78208	42.97 (29.12-62.89)	-0.03 (-0.04--0.02)
Jordan	62825	2493.49 (2216.68-2815.65)	228298	2220.25 (1965.28-2464.51)	-0.36 (-0.39--0.32)	2549	112.51 (78.27-156.73)	9346	95.15 (66.39-135.42)	-0.52 (-0.55--0.48)
Kazakhstan	274011	1859 (1646.77-2080.49)	338243	1792.44 (1587.35-2014.21)	-0.11 (-0.12--0.1)	10261	70.16 (47.64-102.9)	12628	67.08 (45.38-98.93)	-0.13 (-0.14--0.12)
Kenya	160237	983.88 (875.35-1100.92)	366472	940.87 (834.23-1059.78)	-0.27 (-0.35--0.18)	7982	54.43 (39.64-74.57)	17166	47.3 (34.13-65.85)	-0.55 (-0.64--0.46)
Kiribati	1128	2318.96 (2011.46-2658.55)	1991	2205.95 (1915.63-2546.3)	-0.17 (-0.18--0.16)	37	75.03 (47.14-114.08)	65	70.6 (44.62-107.03)	-0.2 (-0.22--0.19)
Kuwait	31644	2444.32 (2191.48-2717.69)	92390	2236.35 (1989.54-2494.79)	-0.3 (-0.31--0.28)	1233	102.57 (71.34-147.2)	3617	89.43 (61.74-130.49)	-0.46 (-0.48--0.44)
Kyrgyzstan	55566	1514.02 (1338.4-1706.76)	87343	1460.19 (1283.61-1642.02)	-0.12 (-0.14--0.1)	2021	55.66 (37.43-82.54)	3195	53.87 (35.72-79.63)	-0.1 (-0.12--0.08)
Lao People's Democratic Republic	51950	1650.99 (1462.87-1840.55)	94508	1534.45 (1355.25-1718.62)	-0.27 (-0.29--0.26)	1963	65.48 (44.67-96.2)	3494	58.07 (39.02-85.36)	-0.4 (-0.42--0.38)
Latvia	59298	1888.22 (1679.98-2138.27)	50732	1820.13 (1608.39-2053.75)	-0.12 (-0.13--0.11)	2077	66.22 (44.12-99.56)	1757	63.19 (41.55-94.56)	-0.14 (-0.15--0.14)
Lebanon	78820	2892.53 (2624.43-3167.79)	143557	2523.63 (2245.78-2826.2)	-0.51 (-0.55--0.48)	3238	121.94 (85.02-174.27)	5826	101.83 (70.36-145.92)	-0.63 (-0.65--0.6)
Lesotho	19625	1736.09 (1541.44-1937.95)	23591	1622.94 (1440.93-1822.49)	-0.24 (-0.25--0.23)	851	79.18 (55.96-110.5)	976	69.85 (49.33-98.4)	-0.43 (-0.44--0.42)
Liberia	23479	1423.51 (1257.66-1602.43)	47407	1277.72 (1132.42-1447.28)	-0.38 (-0.41--0.36)	1064	69.34 (49.89-96.32)	2006	58.83 (41.59-81.87)	-0.58 (-0.62--0.54)
Libya	85812	2638.95 (2329.76-2971.67)	152672	2398.4 (2109.72-2675.91)	-0.33 (-0.35--0.3)	3299	106.4 (72.92-154.33)	5783	91.86 (62.95-132.69)	-0.49 (-0.53--0.45)
Lithuania	77502	1880.17 (1669.44-2131.07)	73822	1807.97 (1603.17-2022.31)	-0.13 (-0.13--0.12)	2712	65.82 (43.37-98.47)	2550	62.63 (40.88-92.62)	-0.16 (-0.16--0.15)
Luxembourg	5976	1445.72 (1294.19-1594.06)	10021	1403.43 (1256.6-1548.3)	-0.1 (-0.11--0.1)	235	55.23 (37.27-81.47)	389	52.49 (35.93-77.42)	-0.17 (-0.17--0.16)
Madagascar	115261	1620.97 (1436.32-1818.89)	248179	1398.05 (1231.57-1584.53)	-0.47 (-0.49--0.46)	5249	78.65 (56.73-109.6)	10767	64.94 (46.05-90.88)	-0.59 (-0.61--0.57)
Malawi	102781	1814.85 (1624.82-2026.89)	188109	1580.99 (1404.12-1763.83)	-0.37 (-0.41--0.34)	4916	95.79 (70.22-131.12)	8500	78.61 (56.68-109.63)	-0.53 (-0.58--0.48)
Malaysia	246177	1576.35 (1395.84-1766.42)	445425	1437.44 (1265.24-1608.99)	-0.22 (-0.27--0.18)	10428	72.17 (50.34-101.93)	18570	60.43 (41.25-87.68)	-0.49 (-0.54--0.44)
Maldives	3215	2156.98 (1907.95-2399.5)	8412	1940.29 (1716.17-2167.36)	-0.35 (-0.38--0.32)	120	86.53 (60.17-126.04)	313	73.25 (49.37-107.75)	-0.53 (-0.57--0.49)
Mali	61919	969.4 (864.14-1082.92)	192059	1241.12 (1096.13-1399.64)	0.58 (0.39-0.78)	2708	45.55 (32.52-64.24)	8138	56.76 (39.76-80.22)	0.52 (0.3-0.75)
Malta	5524	1454.6 (1304.4-1614.67)	7461	1415.54 (1269.94-1571.04)	-0.1 (-0.1--0.09)	215	56.08 (37.95-81.98)	299	53.21 (36.04-77.98)	-0.17 (-0.18--0.17)
Marshall Islands	594	2315.88 (2013.31-2642.18)	948	2186.34 (1874.68-2512.18)	-0.19 (-0.2--0.18)	20	75.28 (47.81-114.23)	31	69.44 (43.75-106.43)	-0.26 (-0.27--0.25)
Mauritania	21183	1553.65 (1356.02-1777.55)	42837	1398.15 (1214.79-1603.24)	-0.35 (-0.37--0.33)	987	76.99 (55.4-108.03)	1902	65.76 (47.02-91.23)	-0.52 (-0.55--0.49)
Mauritius	19473	2059.14 (1829.29-2299.74)	28195	1863.61 (1634.22-2086.98)	-0.33 (-0.34--0.32)	753	81.89 (56.38-119.37)	1087	70.09 (47.39-103.12)	-0.5 (-0.51--0.49)
Mexico	1624855	2387.56 (2130.59-2641.24)	2854337	2166.49 (1922.17-2397.01)	-0.4 (-0.44--0.37)	69430	108.36 (76.27-153.6)	123073	93.74 (65.42-134.43)	-0.55 (-0.57--0.52)
Micronesia (Federated States of)	1529	2315.26 (2024.65-2659.73)	1882	2187.09 (1916.71-2511.13)	-0.19 (-0.19--0.18)	50	75.41 (48.19-114.31)	61	69.92 (44.45-108.37)	-0.25 (-0.25--0.24)
Monaco	534	1425.53 (1271.81-1571.72)	663	1400.53 (1258.16-1544.86)	-0.07 (-0.08--0.07)	22	54.24 (36.75-79.37)	27	52.41 (35.04-77.17)	-0.12 (-0.13--0.12)
Mongolia	31489	2036.36 (1797.28-2295.31)	55492	1912.99 (1686.4-2154.62)	-0.14 (-0.17--0.12)	1222	82.07 (56.88-119.2)	2144	75.48 (51.37-110.53)	-0.2 (-0.23--0.17)
Montenegro	7925	1258.62 (1105.59-1419.41)	9803	1240.41 (1091.58-1398.44)	-0.08 (-0.1--0.06)	280	44.42 (29.28-65.74)	346	43.75 (28.99-64.98)	-0.08 (-0.1--0.06)
Morocco	425813	1959.12 (1793.05-2156.23)	693941	1888.13 (1680.21-2107.85)	-0.09 (-0.11--0.06)	17023	82.4 (57.49-119.06)	27824	76.14 (52.3-111.27)	-0.21 (-0.25--0.18)
Mozambique	96675	1028.98 (924.41-1132.36)	213936	1059.81 (948.86-1192.2)	0.18 (0.04-0.32)	4753	55.9 (40.45-76.19)	9784	54 (39.4-73.62)	0.01 (-0.12-0.14)
Myanmar	794530	2355.58 (2091.59-2624.18)	1159736	2137.77 (1887.89-2389.26)	-0.36 (-0.37--0.34)	35779	113.37 (79.58-158.92)	50432	94.4 (65.03-135.85)	-0.64 (-0.67--0.61)
Namibia	16373	1697.93 (1500.96-1909.14)	29929	1594.62 (1414.64-1792.3)	-0.22 (-0.23--0.21)	693	76.4 (53.77-106.9)	1233	68.32 (47.81-97.6)	-0.37 (-0.39--0.36)
Nauru	147	2294.41 (1990.02-2632.41)	166	2184.34 (1882.34-2505.2)	-0.16 (-0.18--0.14)	5	74.54 (47.3-113.39)	5	69.62 (43.86-106.54)	-0.22 (-0.25--0.2)
Nepal	333156	2548.61 (2273.72-2835.03)	684408	2586.72 (2275.37-2908.46)	-0.2 (-0.32--0.09)	14339	118.05 (84.61-162.23)	29031	112.56 (79.94-159.79)	-0.36 (-0.53--0.19)
Netherlands	210639	1312.22 (1169.98-1451.6)	259691	1286.62 (1149.94-1422.48)	-0.06 (-0.07--0.05)	8159	49.87 (34.07-73.78)	10175	47.97 (32.23-70.62)	-0.12 (-0.12--0.11)
New Zealand	51015	1463.86 (1306.15-1618.21)	79111	1434.7 (1283.97-1594.9)	-0.06 (-0.07--0.05)	1891	53.85 (35.7-79.5)	2971	52.19 (33.95-77.1)	-0.09 (-0.1--0.08)
Nicaragua	70779	2499.06 (2245.69-2778.51)	142882	2314.7 (2070.85-2561.91)	-0.23 (-0.23--0.22)	2817	107.74 (76.09-154.13)	5712	94.95 (66.8-138.58)	-0.39 (-0.4--0.38)
Niger	54503	1003.85 (910.48-1096.68)	209907	1408.49 (1252.99-1586.47)	1.09 (0.95-1.24)	2429	51.43 (37.44-69.9)	9327	69.58 (49.92-97.68)	0.97 (0.83-1.1)
Nigeria	921688	1285.52 (1151.43-1432.54)	2292028	1295.64 (1151.57-1447.81)	0.04 (-0.02-0.1)	40775	61.1 (43.67-85.78)	98225	60.37 (42.46-85.49)	0.05 (-0.01-0.11)
Niue	51	2290.21 (2003.89-2620.76)	44	2143.14 (1857.91-2458.51)	-0.23 (-0.24--0.22)	2	74.16 (46.51-113.37)	1	67.99 (42.45-104.15)	-0.29 (-0.3--0.28)
North Macedonia	24569	1260.22 (1112.18-1415.38)	33966	1238.72 (1091.6-1394.35)	-0.08 (-0.1--0.06)	869	44.62 (29.35-65.92)	1199	43.67 (29-65.26)	-0.09 (-0.11--0.07)
Northern Mariana Islands	614	2244.19 (1937.36-2587.92)	1153	2145.78 (1851.19-2459.66)	-0.14 (-0.15--0.13)	21	72.95 (46.05-110.82)	37	68.79 (42.63-103.44)	-0.17 (-0.19--0.16)
Norway	67876	1442.13 (1291.14-1590.68)	88481	1441.12 (1288.97-1588.67)	-0.04 (-0.06--0.02)	2619	53.96 (36.19-79.69)	3401	53.18 (35.92-78.57)	-0.07 (-0.08--0.06)
Oman	58840	3440.5 (3066.01-3833.98)	157520	4007.19 (3604.72-4429.02)	0.33 (0.22-0.45)	2178	136.18 (91.44-196.95)	5962	158.56 (108.57-231.4)	0.3 (0.18-0.43)
Pakistan	2353936	3133.77 (2748.26-3571.03)	5118781	3003.8 (2645.04-3432.35)	-0.22 (-0.3--0.13)	93796	129.3 (88.28-184.93)	203386	123.3 (85.14-177.46)	-0.23 (-0.3--0.16)
Palau	264	2265.69 (1952.35-2591.25)	476	2136.83 (1848.76-2457.5)	-0.2 (-0.21--0.19)	9	73.12 (46.5-110.6)	15	67.64 (42.85-101.82)	-0.25 (-0.26--0.24)
Palestine	37015	2318.67 (2073.16-2574.4)	91908	2089.07 (1855.84-2329.77)	-0.35 (-0.37--0.32)	1378	91.88 (63.13-133.2)	3358	79.43 (53.95-116.46)	-0.49 (-0.51--0.46)
Panama	52111	2547.36 (2286.24-2833.47)	106847	2443.84 (2202.24-2705.23)	-0.13 (-0.15--0.11)	2091	105.96 (72.7-152.26)	4262	97.33 (66.73-141.86)	-0.28 (-0.3--0.26)
Papua New Guinea	74853	2715.44 (2355.3-3106.99)	194835	2603.95 (2245.76-2981.19)	-0.22 (-0.33--0.11)	2403	86.16 (55.3-131.28)	6216	82.08 (51.74-124.58)	-0.23 (-0.34--0.12)
Paraguay	114978	3429.89 (3116.74-3744.02)	232757	3407.02 (3100.74-3724.79)	0.03 (-0.01-0.08)	4149	126.76 (84.67-186.41)	8304	122.24 (81.46-180.6)	-0.08 (-0.12--0.04)
Peru	579193	3248.7 (2921.19-3597.04)	1145911	3196.68 (2875.97-3553.96)	-0.1 (-0.2--0.01)	23086	134.94 (92.94-196.24)	44612	124.86 (85.14-180.98)	-0.32 (-0.4--0.23)
Philippines	1065763	2213.99 (1959.35-2475.23)	2156181	2131.36 (1886.79-2385.18)	-0.18 (-0.21--0.15)	38452	81.84 (55.27-121.11)	77856	77.48 (52.02-116.38)	-0.21 (-0.24--0.18)
Poland	545932	1333.67 (1184.55-1493.16)	689858	1305.32 (1157.68-1458.01)	-0.1 (-0.12--0.08)	19187	46.86 (31.06-69.5)	24400	46.04 (30.76-68.01)	-0.08 (-0.1--0.06)
Portugal	159770	1470.73 (1321.65-1620.3)	184535	1418.73 (1267.1-1574.62)	-0.12 (-0.12--0.11)	6341	57.05 (38.84-83.93)	7465	53.45 (35.77-79.14)	-0.21 (-0.22--0.2)
Puerto Rico	57836	1586.39 (1410.58-1767.8)	62141	1498.48 (1330.35-1666.24)	-0.18 (-0.19--0.17)	2243	61.55 (41.67-90.8)	2428	56.34 (38.15-83.55)	-0.28 (-0.29--0.27)
Qatar	8276	2574.35 (2300.6-2846.41)	54200	2316.18 (2064.47-2571.23)	-0.34 (-0.37--0.32)	328	109.41 (74.66-156.53)	2101	93.13 (64.04-134.68)	-0.53 (-0.55--0.5)
Republic of Korea	582549	1373.44 (1242.24-1509.88)	783709	1337.86 (1195.49-1478.5)	-0.07 (-0.09--0.05)	22096	53.42 (36.31-77.61)	31000	50.73 (34.35-74.56)	-0.14 (-0.16--0.13)
Republic of Moldova	103507	2324.69 (2044.02-2602.93)	117464	2444.62 (2172.42-2697.55)	0.29 (0.21-0.36)	3535	79.36 (51.75-119.63)	3901	81.96 (53.72-123.42)	0.23 (0.15-0.3)
Romania	326184	1264.8 (1114.85-1427.35)	339985	1250.29 (1101.22-1408.74)	-0.07 (-0.09--0.05)	11528	44.67 (29.38-66.49)	12148	44.43 (29.73-65.23)	-0.05 (-0.06--0.03)
Russian Federation	3975144	2389.76 (2142.23-2660.59)	4354563	2311.39 (2068.77-2573.75)	-0.07 (-0.09--0.05)	146127	87.7 (59.33-129.76)	157995	83.26 (55.94-123.39)	-0.13 (-0.14--0.11)
Rwanda	53153	1276.41 (1136.31-1426.89)	99360	1099.97 (981.92-1238.91)	-0.52 (-0.54--0.51)	2555	66.61 (49.07-91.7)	4537	53.44 (38.11-74.19)	-0.75 (-0.77--0.73)
Saint Kitts and Nevis	601	1521.13 (1354.21-1690.02)	918	1424.67 (1260.28-1594.16)	-0.21 (-0.22--0.2)	23	59.19 (40.3-86.58)	35	53.47 (35.94-78.75)	-0.33 (-0.34--0.31)
Saint Lucia	1813	1516.41 (1347.9-1691.47)	2855	1417.5 (1256.55-1591.06)	-0.22 (-0.23--0.21)	68	59.3 (39.81-86.99)	110	53.49 (36.42-78.83)	-0.33 (-0.34--0.32)
Saint Vincent and the Grenadines	1483	1534.84 (1370.23-1712.85)	1781	1433.73 (1280.98-1602.14)	-0.22 (-0.23--0.21)	56	60.26 (41.02-88.97)	68	54.3 (36.63-80.39)	-0.33 (-0.34--0.32)
Samoa	2602	2301.11 (2001.69-2630.38)	3714	2191.08 (1895.33-2530.17)	-0.18 (-0.19--0.17)	85	74.57 (47.48-114.03)	120	69.87 (44.16-107.04)	-0.22 (-0.24--0.21)
San Marino	374	1427.21 (1273.39-1577.96)	559	1400.13 (1249.29-1554.78)	-0.07 (-0.08--0.07)	15	54.34 (36.78-79.46)	22	52.5 (35.48-78)	-0.12 (-0.13--0.12)
Sao Tome and Principe	1339	1586.19 (1387.48-1800.33)	2280	1421.54 (1243.14-1612.26)	-0.4 (-0.43--0.38)	63	79.11 (56.74-110.15)	100	66.4 (46.81-91.77)	-0.62 (-0.65--0.59)
Saudi Arabia	426151	3552.64 (3181.21-3930.57)	941425	3015.33 (2762.64-3293.38)	-0.6 (-0.65--0.55)	17784	158.63 (111.15-225.03)	38195	125.68 (86.99-178.6)	-0.82 (-0.88--0.77)
Senegal	72830	1549.05 (1375.87-1726.57)	156322	1432.35 (1266.22-1617.32)	-0.36 (-0.39--0.32)	3919	91.83 (66.46-126.01)	7837	77.68 (57.31-106.33)	-0.56 (-0.61--0.51)
Serbia	132606	1260.11 (1115.58-1412.6)	152486	1240.19 (1093.16-1401.63)	-0.09 (-0.1--0.07)	4694	44.63 (29.61-66.37)	5404	43.79 (29.69-64.39)	-0.09 (-0.11--0.07)
Seychelles	1344	2043.15 (1799.89-2274.89)	2104	1884.62 (1662.13-2126.41)	-0.27 (-0.28--0.26)	53	81.95 (57.15-119.09)	80	71.3 (48.45-104.37)	-0.44 (-0.45--0.44)
Sierra Leone	39361	1447.76 (1281.85-1615.18)	81030	1368.06 (1226.01-1512.26)	-0.22 (-0.28--0.16)	1859	74.44 (54.28-103.04)	3627	67.25 (48.67-92.51)	-0.36 (-0.43--0.29)
Singapore	51822	1751.94 (1560.57-1938.69)	104062	1703.83 (1528.47-1885.94)	-0.09 (-0.1--0.07)	1932	66.82 (44.11-98.41)	4035	63.82 (42.43-95.17)	-0.14 (-0.16--0.12)
Slovakia	71047	1263.86 (1110.14-1417.59)	91299	1246.56 (1101.12-1401.27)	-0.07 (-0.08--0.05)	2501	44.45 (29.61-66.05)	3233	44.02 (29.33-66.08)	-0.05 (-0.07--0.03)
Slovenia	28141	1265.1 (1115.83-1417.96)	38130	1235.01 (1086.48-1399.57)	-0.1 (-0.12--0.08)	986	44.3 (29.17-66.65)	1347	43.49 (28.65-64.89)	-0.09 (-0.11--0.07)
Solomon Islands	4687	2308.37 (2020.92-2624.25)	10397	2239.38 (1939.9-2568.05)	-0.11 (-0.13--0.1)	156	75.48 (47.95-115.57)	342	72.29 (45.31-109.74)	-0.15 (-0.17--0.13)
Somalia	44759	833.38 (758.45-908.23)	112305	754.16 (682.41-822.67)	-0.33 (-0.34--0.32)	1977	42.19 (30.67-58.14)	4817	36.92 (26.54-50.89)	-0.43 (-0.44--0.42)
South Africa	418868	1485.78 (1330.04-1649.71)	772494	1487.33 (1315.29-1667.61)	-0.03 (-0.08-0.02)	17623	65.29 (46.53-91.55)	32498	63.59 (45.18-89.92)	-0.06 (-0.11--0.01)
South Sudan	49286	987.4 (875.37-1108.49)	76002	884.78 (780.82-991.63)	-0.34 (-0.36--0.32)	2037	45.06 (31.37-63.13)	2943	37.67 (26.29-54.01)	-0.55 (-0.58--0.53)
Spain	1081716	2573.48 (2314.41-2837.48)	1398197	2596.83 (2333.55-2900.07)	0.07 (0.03-0.1)	44514	103.42 (71.43-150.3)	58298	101.76 (68.6-150.7)	-0.01 (-0.05-0.02)
Sri Lanka	349972	2399.25 (2122.97-2678.03)	539244	2198.2 (1931.93-2457.35)	-0.23 (-0.33--0.14)	13218	93.89 (64.26-137.79)	20280	81.51 (54.68-119.95)	-0.39 (-0.49--0.29)
Sudan	338333	2194.92 (1987.28-2419.22)	684154	1947.12 (1747.9-2146.95)	-0.44 (-0.46--0.41)	15567	111.32 (80.68-153.27)	29150	90.61 (64.23-127.23)	-0.68 (-0.7--0.67)
Suriname	5286	1490.23 (1329.89-1670.14)	8297	1382.9 (1224.6-1553.85)	-0.28 (-0.3--0.27)	196	57.02 (38.24-84.49)	308	51.07 (34.24-76.79)	-0.4 (-0.42--0.38)
Sweden	68134	704 (613.81-792.05)	85458	706.37 (613.59-797.73)	0.03 (0.01-0.04)	2870	28.41 (19.53-41.35)	3595	28.23 (19.14-40.94)	0 (-0.02-0.01)
Switzerland	107967	1422.19 (1278.11-1579.35)	146663	1401.29 (1249.78-1556.86)	-0.06 (-0.07--0.05)	4193	53.64 (36.55-79.02)	5759	52.21 (34.83-77.51)	-0.09 (-0.1--0.09)
Syrian Arab Republic	255658	2646.83 (2362.34-2943.84)	338586	2400.03 (2154.81-2675.2)	-0.34 (-0.35--0.32)	10491	116.63 (82.26-164.57)	14003	99.73 (69.75-142.83)	-0.53 (-0.55--0.5)
Taiwan (Province of China)	207753	1214.02 (1073.13-1357.65)	380711	1091.77 (965.07-1234.83)	-0.34 (-0.36--0.32)	7239	42.45 (28.55-63.14)	12529	35.98 (23.44-54.17)	-0.52 (-0.55--0.5)
Tajikistan	72016	1804.67 (1584.85-2019.6)	145439	1743.9 (1541.72-1951.83)	-0.11 (-0.12--0.11)	2661	68.75 (46.67-99.95)	5403	66.27 (44.71-98.07)	-0.12 (-0.13--0.11)
Thailand	998356	1935.26 (1718.83-2156.82)	1268261	1666.92 (1492.96-1854.36)	-0.57 (-0.62--0.51)	35822	71.91 (48.06-105.87)	47614	60.06 (39.62-88.93)	-0.65 (-0.7--0.6)
Timor-Leste	15173	3019.39 (2676.52-3362.54)	31152	2760.87 (2461.47-3072.01)	-0.32 (-0.44--0.2)	549	114.03 (76.89-165.85)	1103	99.76 (66.68-148.14)	-0.43 (-0.53--0.33)
Togo	28814	1297.5 (1145.59-1463.49)	84408	1439.11 (1266.76-1649.15)	0.17 (0.05-0.29)	1233	62.06 (44.64-87.2)	3714	67.97 (48.33-95.59)	0.12 (-0.02-0.26)
Tokelau	33	2329.77 (2017.58-2679.45)	32	2176.66 (1872.32-2492.89)	-0.24 (-0.26--0.23)	1	76 (48.02-113.28)	1	69.4 (43.6-105.78)	-0.31 (-0.32--0.3)
Tonga	1383	2047.9 (1806.26-2295.81)	1672	1896.25 (1649.78-2165.24)	-0.31 (-0.34--0.28)	46	67.65 (43.58-102.58)	54	60.87 (38.07-91.84)	-0.4 (-0.43--0.37)
Trinidad and Tobago	18032	1650.2 (1467.75-1831.57)	24140	1525.2 (1381.93-1673.9)	-0.28 (-0.29--0.27)	672	62.98 (42.79-93.19)	903	56.07 (37.99-83)	-0.41 (-0.43--0.39)
Tunisia	136382	1950.13 (1737.14-2168.45)	224767	1795.66 (1589.38-2023.15)	-0.25 (-0.27--0.24)	5733	85.91 (60.28-121.92)	9331	73.83 (51.44-107.07)	-0.48 (-0.49--0.46)
Turkmenistan	55429	1831.17 (1623.29-2065.29)	84099	1704.32 (1498.76-1906.04)	-0.25 (-0.29--0.21)	1994	67.25 (44.05-100.69)	3053	62.38 (41.12-93.4)	-0.26 (-0.29--0.22)
Tuvalu	180	2359.54 (2052.19-2706.38)	249	2209.02 (1929.1-2532.33)	-0.22 (-0.23--0.21)	6	77.27 (49.43-118.24)	8	70.81 (44.71-107.22)	-0.27 (-0.28--0.26)
T眉rkiye	829042	1671.5 (1491.58-1864.22)	1482166	1676.01 (1487.99-1872.69)	0.02 (-0.09-0.12)	34056	71.39 (49.86-101.8)	59931	67.31 (46.39-97.47)	-0.19 (-0.29--0.09)
Uganda	82586	645.6 (580.27-704.48)	235451	790.76 (702.69-884.3)	0.98 (0.85-1.11)	3847	34.38 (25.03-46.95)	10337	38.61 (27.58-53.34)	0.76 (0.61-0.91)
Ukraine	1231069	1974.66 (1759.46-2204.9)	1142047	1915.71 (1702.61-2141.97)	-0.1 (-0.11--0.09)	43270	69.54 (46.94-103.4)	39803	67 (44.33-100.25)	-0.11 (-0.12--0.1)
United Arab Emirates	33364	2510.79 (2252.99-2802.08)	180165	2260 (2004.45-2521.72)	-0.35 (-0.37--0.32)	1322	107.39 (75.46-153.02)	7185	91.91 (64.29-133.51)	-0.51 (-0.54--0.48)
United Kingdom	1084853	1714.03 (1542.78-1893.5)	1296024	1671.53 (1507.47-1851.53)	-0.1 (-0.11--0.09)	41964	64.2 (43.13-94.35)	49715	61.32 (41.05-90.63)	-0.16 (-0.17--0.15)
United Republic of Tanzania	231422	1413.78 (1266.36-1569.7)	505147	1249.83 (1112.74-1391.15)	-0.42 (-0.46--0.38)	11021	74.74 (54.37-100.01)	24127	65.11 (47.27-88.47)	-0.37 (-0.43--0.32)
United States of America	2798418	1056.77 (941.84-1172.29)	3867960	1073.85 (956.17-1192.41)	0.08 (0.06-0.1)	107990	40.16 (27.06-58.82)	149609	39.94 (26.77-58.7)	0.01 (-0.01-0.02)
United States Virgin Islands	1616	1590.16 (1425.55-1775.39)	1624	1499.88 (1332.06-1679)	-0.18 (-0.19--0.17)	62	61.9 (42.21-91.45)	64	56.69 (38.51-84.69)	-0.27 (-0.28--0.26)
Uruguay	59184	1789.99 (1604.19-1980.19)	66615	1725.78 (1538.55-1906.85)	-0.1 (-0.11--0.09)	2168	64.66 (43.1-96.11)	2451	61.51 (40.24-92.54)	-0.13 (-0.14--0.12)
Uzbekistan	294628	1829.49 (1614.86-2071.2)	548650	1745.91 (1543.09-1957.3)	-0.15 (-0.15--0.14)	10946	69.61 (46.99-102.23)	20416	65.65 (44.11-98.09)	-0.19 (-0.19--0.18)
Vanuatu	1885	2066.89 (1803.99-2339.07)	4450	1990.39 (1716.32-2306.27)	-0.13 (-0.14--0.11)	62	66.76 (42.52-101.82)	144	63.63 (39.5-96.7)	-0.15 (-0.17--0.13)
Venezuela (Bolivarian Republic of)	334934	2243.58 (2018.55-2491.13)	608866	2165.67 (1948.51-2389.56)	-0.1 (-0.12--0.09)	13675	97.48 (68.72-138.93)	25796	91.05 (62.72-130.08)	-0.2 (-0.22--0.18)
Viet Nam	1018704	1750.19 (1571.87-1927.46)	1615454	1624.04 (1472.86-1780.55)	-0.42 (-0.47--0.37)	43854	80.81 (57.34-114.15)	68703	68.95 (48.03-100.28)	-0.71 (-0.77--0.65)
Yemen	188348	1770.12 (1593.07-1960.93)	535914	2077.03 (1815.39-2343.19)	0.34 (0.17-0.51)	7507	77.25 (53.33-111.52)	21765	89.86 (62.51-128.74)	0.28 (0.08-0.47)
Zambia	60327	1327.64 (1156.54-1508.23)	141018	1178.61 (1030.42-1339.99)	-0.44 (-0.46--0.42)	2366	55.47 (38.12-79.09)	5305	46.72 (32.01-67.74)	-0.59 (-0.6--0.57)
Zimbabwe	124711	1903.27 (1701.51-2119.01)	190962	1785.58 (1582.57-1992.12)	-0.18 (-0.2--0.16)	5460	91.77 (65.69-127.36)	8142	82.09 (58.04-115.2)	-0.32 (-0.35--0.3)
